# Supplementary material
Source: publisher site journal article supplement (https://www.dovepress.com/get_supplementary_file.php?f=452098.docx)
Supplement: Supplementary file 1 [file get_supplementary_file.php]

**Phytochemical investigation and *in vitro* antimicrobial and antioxidant activities evaluation of *Erianthemum aethiopicum* Wiens and Polhill**

Teshome Gonfaa*, Ayalew Temesgena, Tsegu Kirosa*, Sivasubramanian Muthusaravanana, and Olyad Erba Urgessab, Tadele Teklub

aDepartment of Chemistry, College of Natural and Computational Sciences, Haramaya University, P. O. Box 138, Dire Dawa, Ethiopia

bSchool of Biological Sciences and Biotechnology, College of Natural and Computational Sciences, Haramaya University, P. O. Box 138, Dire Dawa, Ethiopia

Correspondence: Teshome Gonfa; [tashe2002@gmail.com](mailto:tashe2002@gmail.com), ORCID: [**https://orcid.org/0000-0001-5691-6905**](https://orcid.org/0000-0001-5691-6905)and Tsegu Kiros; [kirosorg@gmail.com](mailto:kirosorg@gmail.com), ORCID: [**https://orcid.org/0000-0002-2073-6889**](https://orcid.org/0000-0002-2073-6889)

Supplementary Materials

**Antimicrobial Activities of Various Extracts**

***E. Coli***

***Hexane Chloroform Methanol***


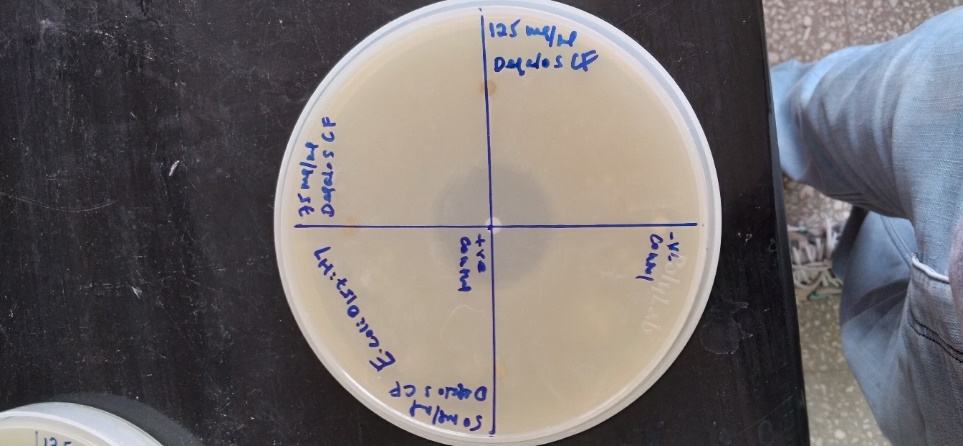

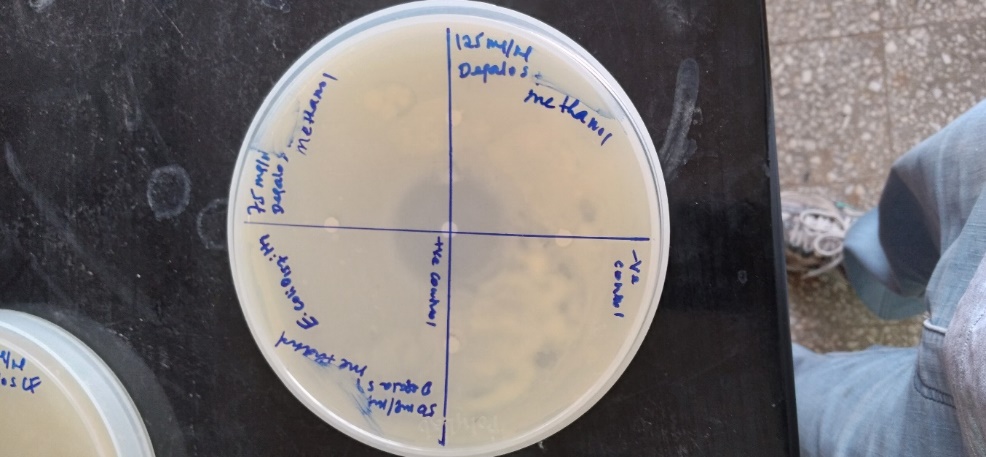

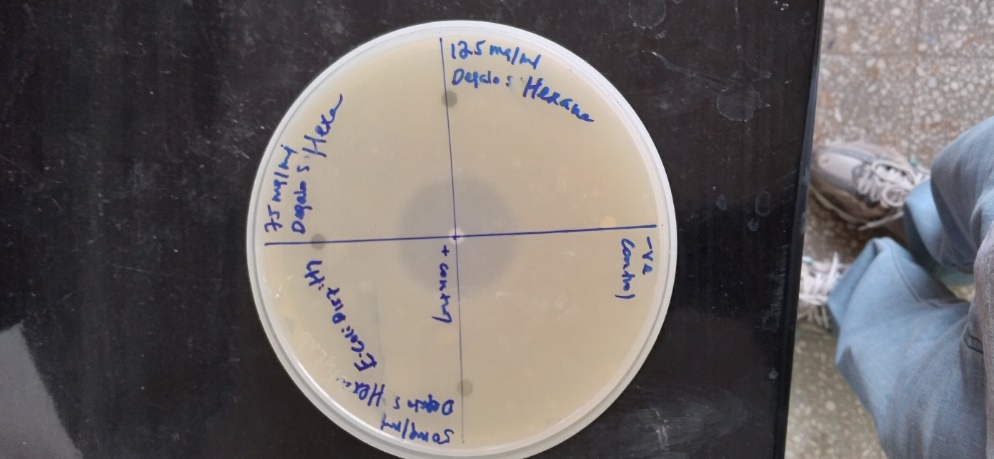


Figure S1: Antibacterial activity inhibition zone images of extracts against *E. coli*.

***Hexane Chloroform Methanol***


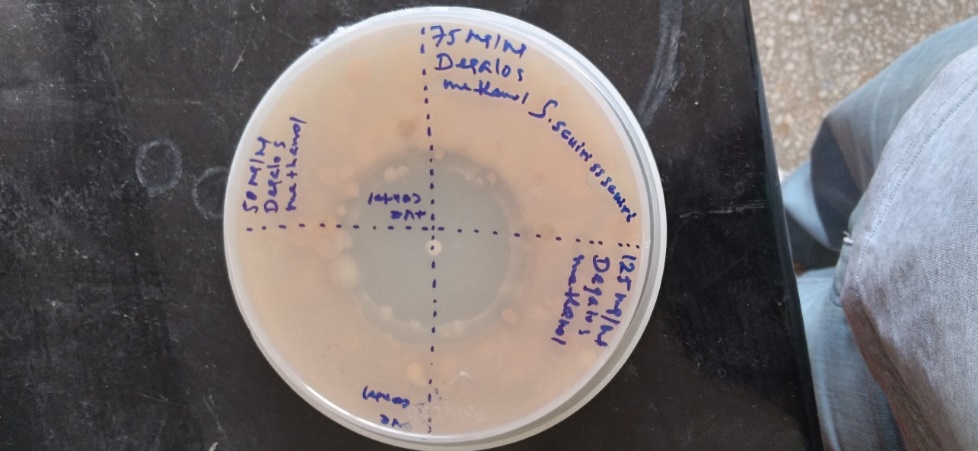

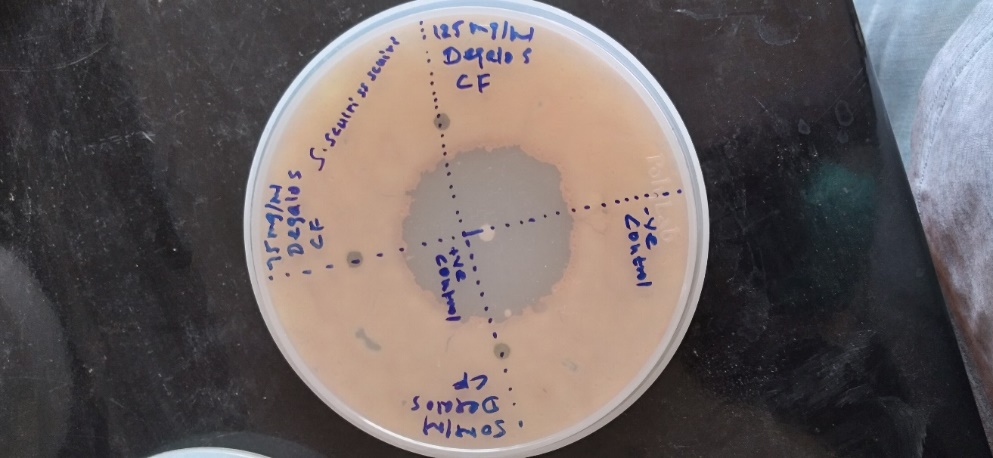

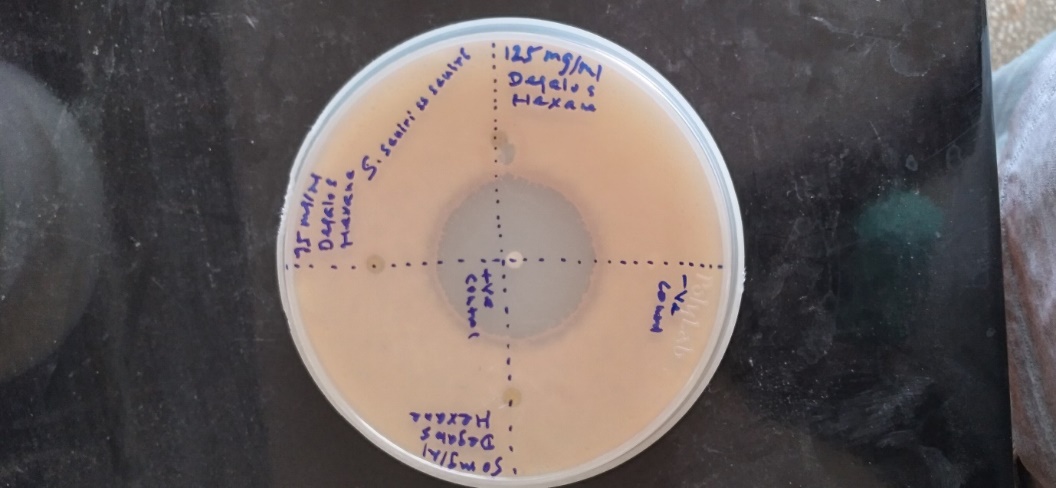


Figure S2: Antibacterial activity inhibition zone images of extracts against Staphylococcus *sciuris ss sciuri*

***Hexane Chloroform Methanol***


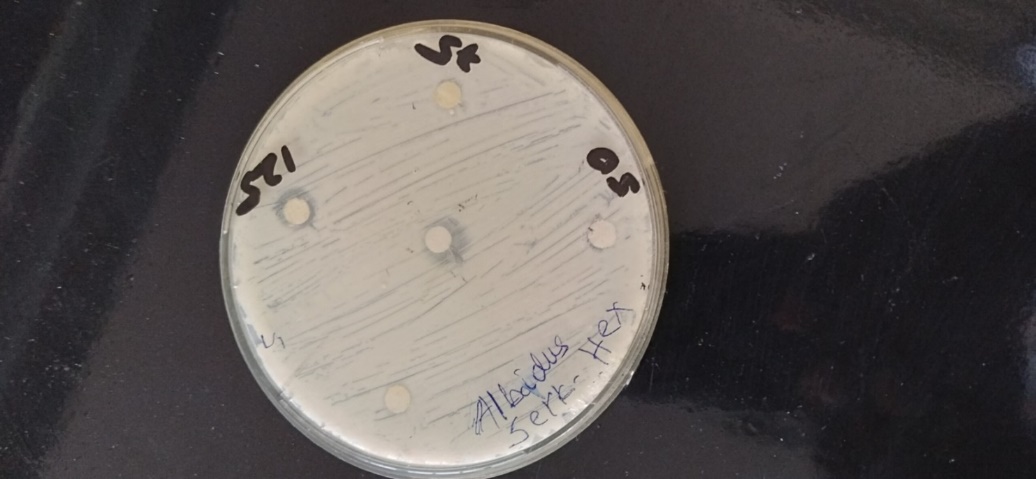

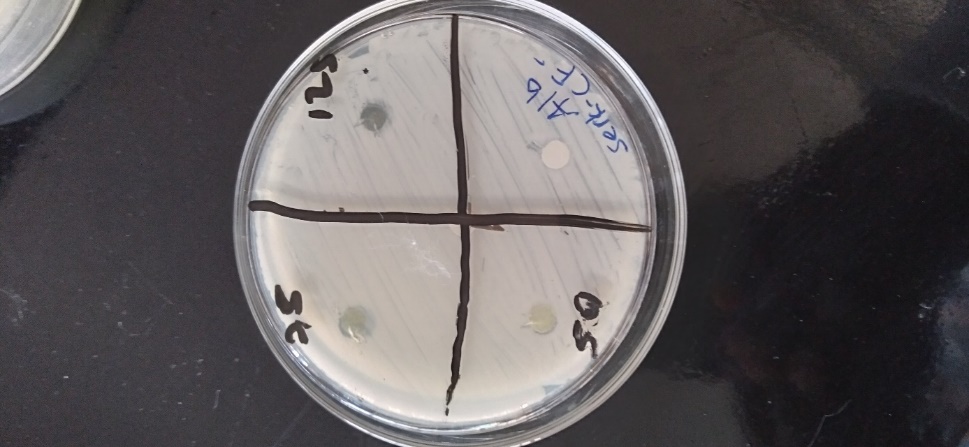

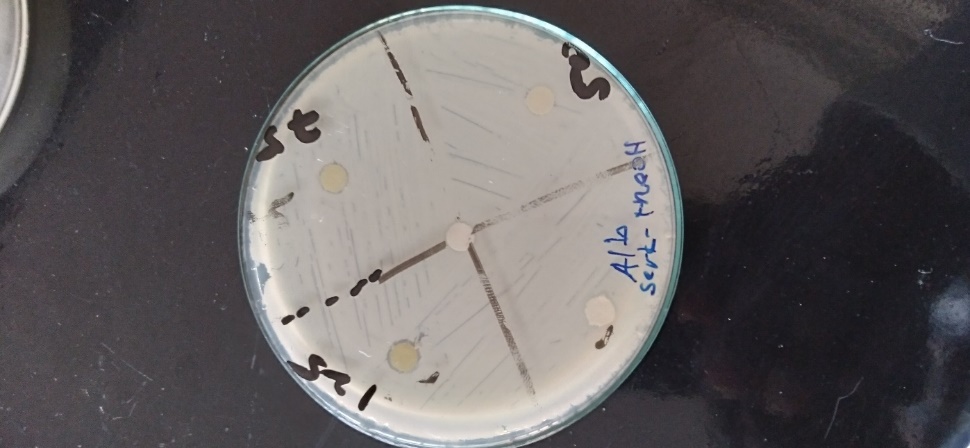


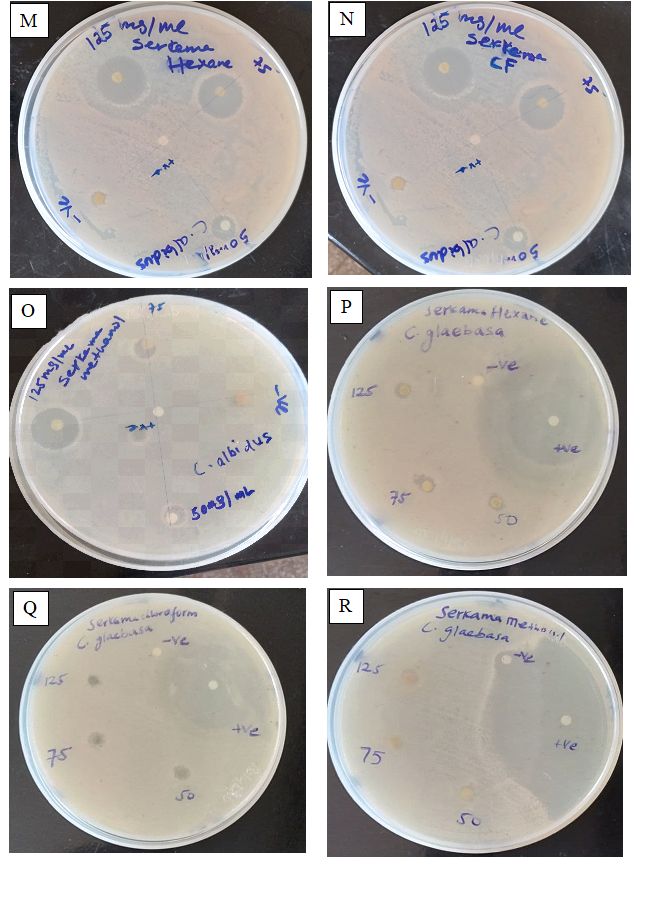

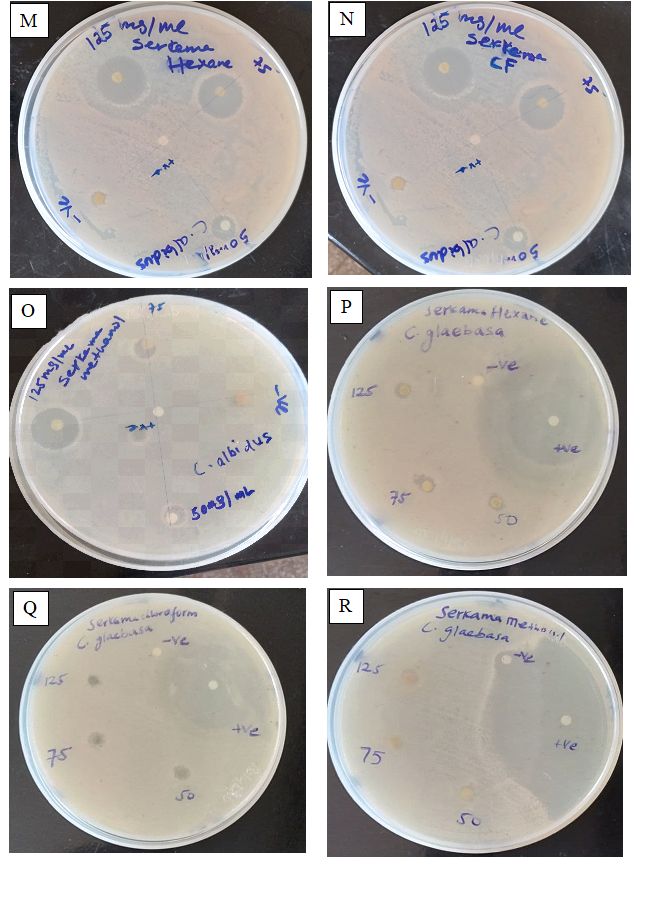


Figure S3: Antifungal activity inhibition zone images of extracts agaisnt *Cryptococcus albidus*

***Hexane Chloroform Methanol***


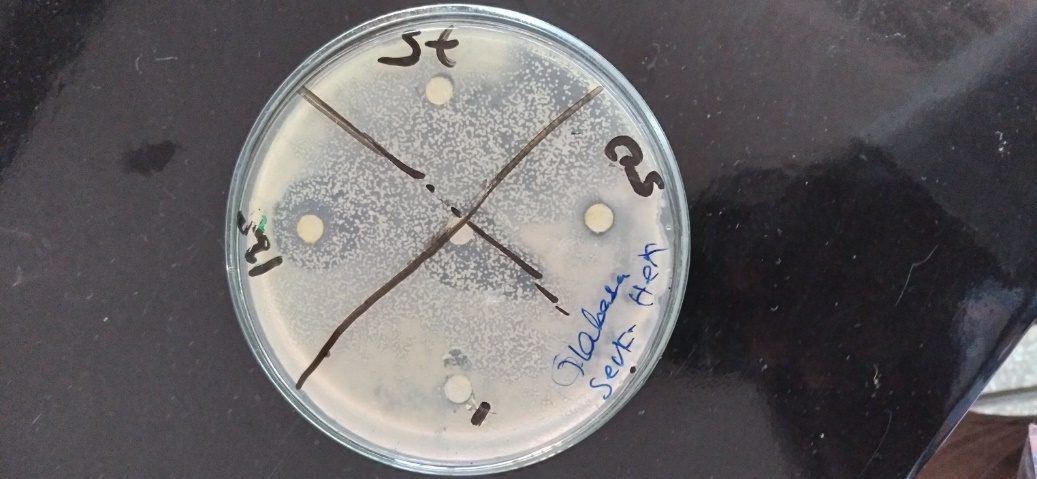

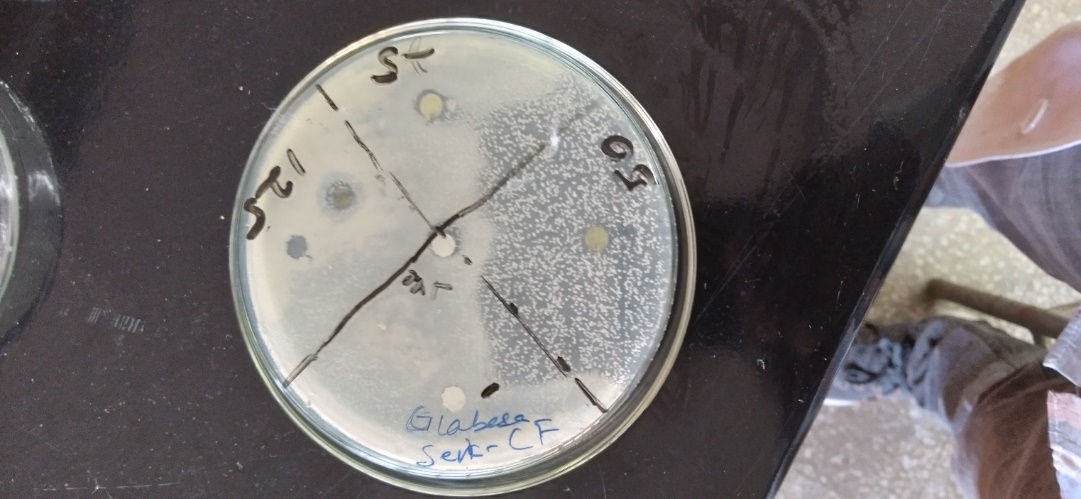

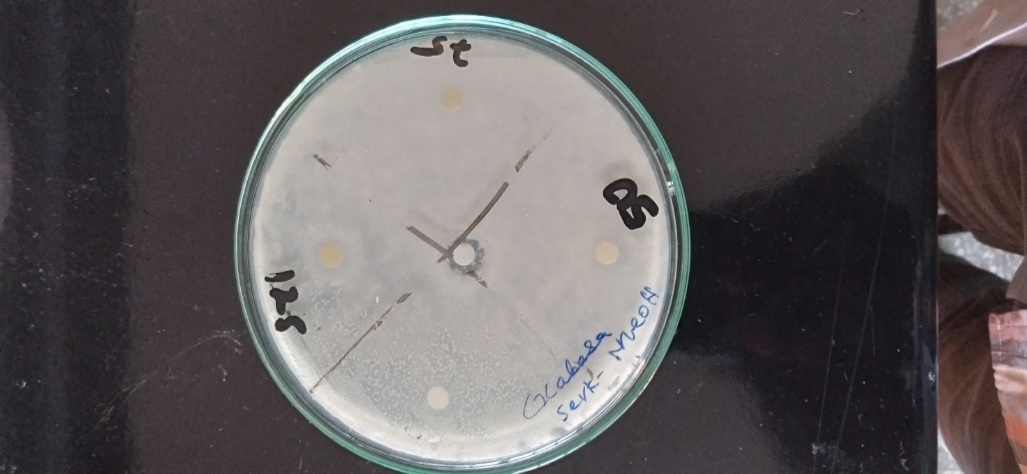


Figure S4: Antifungal activity inhibition zone images of extracts against *Candida glaebosa*
